# Supplementary material for: Organic neuromorphic vision devices with multilevel memory for palmprint identification
Source: Royal Society of Chemistry journal article supplement (doi:10.1039/d5sc07902k), 2026-01-01
Supplement: d5sc07902k1.pdf [file d5sc07902k1.pdf]

## Supporting information

### Organic Neuromorphic Vision Devices with Multilevel Memory for Palmprint Identification

Chenxi Liu<sup>1,2</sup>, Yongfeng Gu<sup>3</sup>, Yongjie Ren<sup>3</sup>, Mingyi Ding<sup>1,2\*</sup>, Tao Deng<sup>4\*</sup>, Harald Fuchs<sup>5</sup>, Deyang Ji<sup>1,2\*</sup> and Wenping Hu<sup>2,6</sup>

<sup>1</sup>Tianjin Key Laboratory of Molecular Optoelectronic Sciences, Department of Chemistry, Institute of Molecular Aggregation Science, Tianjin University, Tianjin 300072, China

<sup>2</sup>Key Laboratory of Organic Integrated Circuit, Ministry of Education, Tianjin University, Tianjin 300072, China

<sup>3</sup>National Key Laboratory of Precision Testing Technology and Instruments, Tianjin University

<sup>4</sup>School of Electronic and Information Engineering, Beijing Jiaotong University, Beijing 100044, China.

<sup>5</sup>Physikalisches Institut and Center for Nanotechnology (CeNTech), Westfälische Wilhelms-Universität Münster, Germany

<sup>6</sup>Tianjin Key Laboratory of Molecular Optoelectronic Sciences, Department of Chemistry, School of Science, Tianjin University, 300072, China

\* Corresponding author E-mail address: [jideyang@tju.edu.cn](mailto:jideyang@tju.edu.cn); [dengtao@bjtu.edu.cn](mailto:dengtao@bjtu.edu.cn)

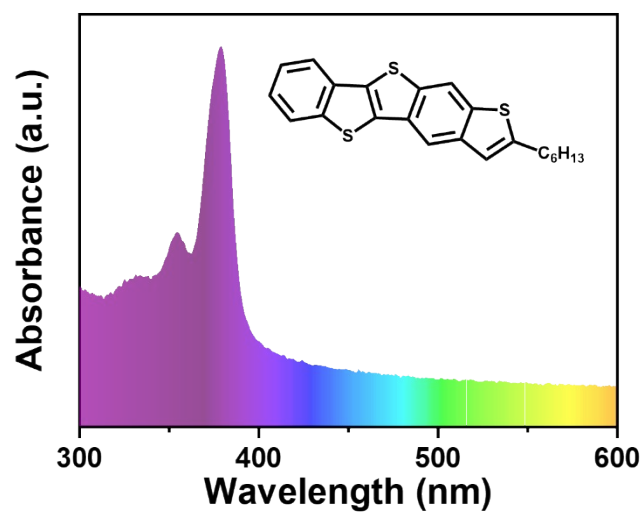

**Fig. S1** UV-vis absorption spectra of BTBTT6-syn film; inset: molecular structure diagram of BTBTT6-syn.

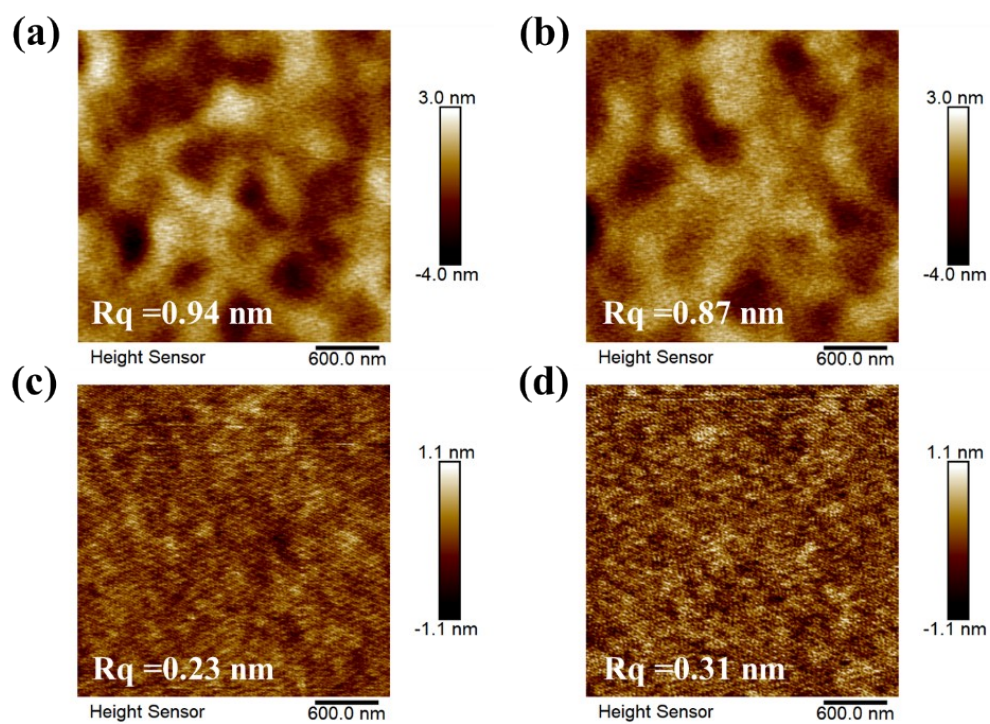

**Fig. S2** AFM images of (a) PVP, (b) PPO, (c) PVP/HfO<sub>2</sub>, and (d) PPO/HfO<sub>2</sub>.

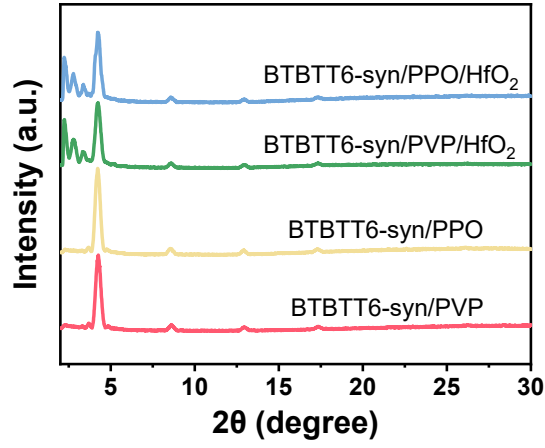

**Fig. S3** XRD patterns of vacuum-deposited BTBTT6-syn on PVP, PPO, PVP/HfO<sub>2</sub>, and PPO/HfO<sub>2</sub>.

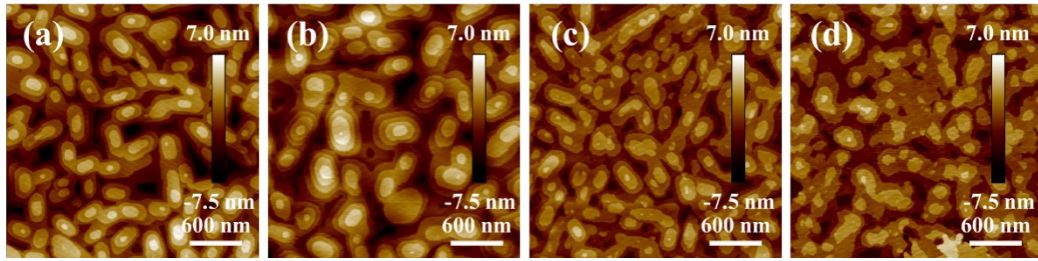

**Fig. S4** AFM images of BTBTT6-syn films grown on (a) PVP, (b) PPO, (c) PVP/HfO<sub>2</sub>, and (d) PPO/HfO<sub>2</sub> dielectric layers.

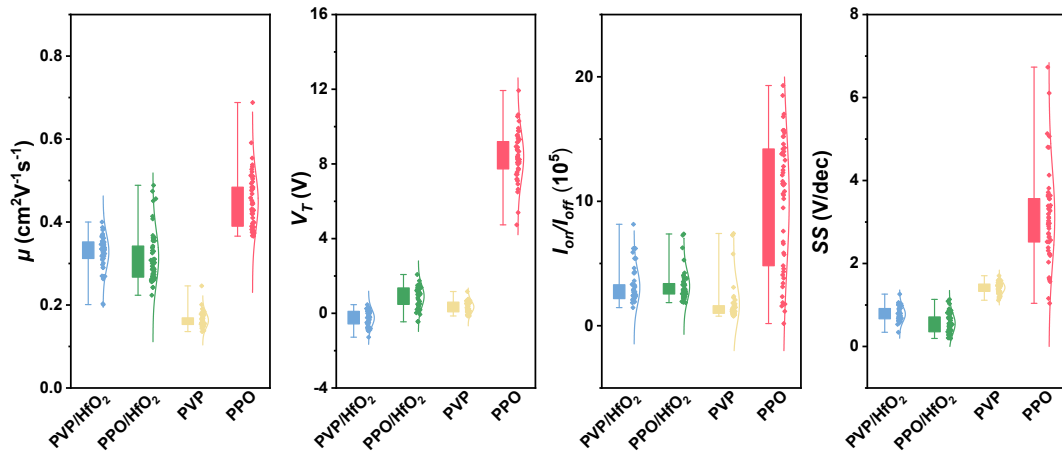

**Fig. S5** Statistical analysis of electrical characteristics of 49 devices.

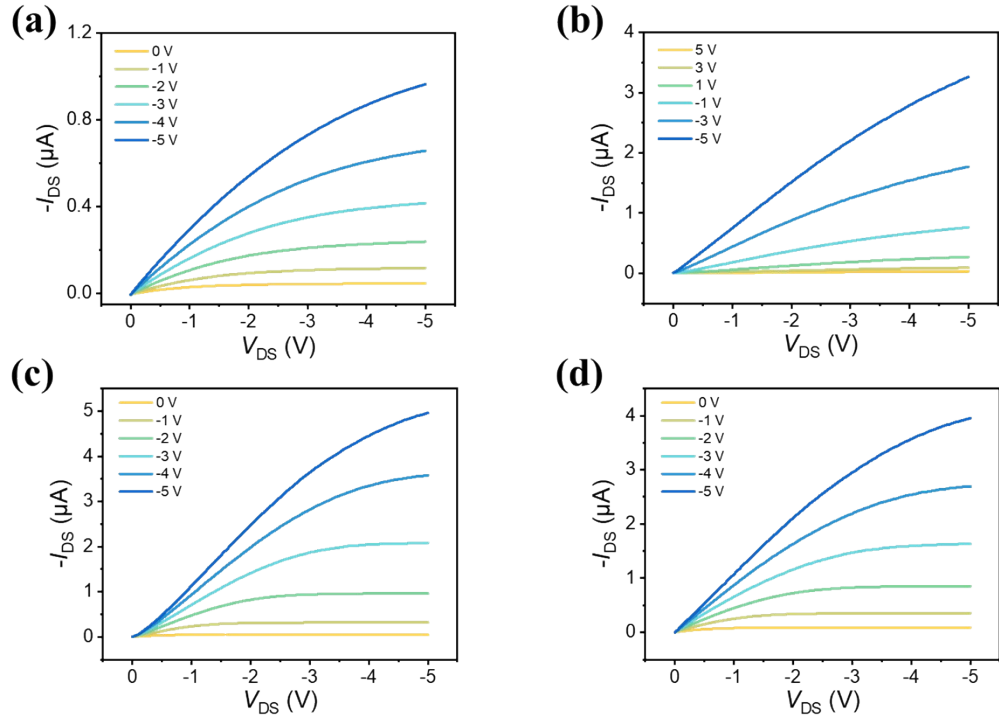

**Fig. S6** Output curves of the devices with (a) PVP, (b) PPO, (c) PVP/HfO<sub>2</sub>, and (d) PPO/HfO<sub>2</sub> as the dielectric layer.

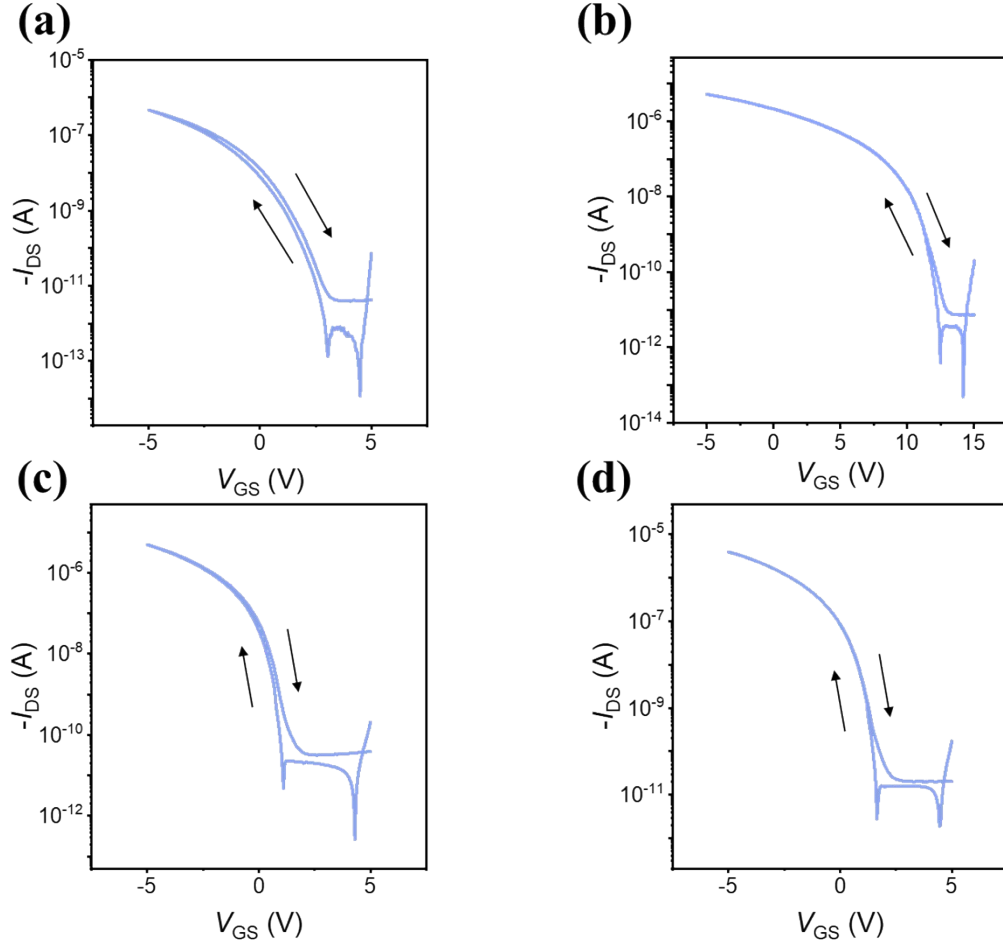

**Fig. S7** Transfer characteristics (forward and reverse sweeps) with (a) PVP, (b) PPO, (c) PVP/HfO<sub>2</sub> and (d) PPO/HfO<sub>2</sub> as the dielectric layers.

The photosensitivity ( $P$ ) and photoresponsivity ( $R$ ) and detectivity ( $D^*$ ) are key parameters for measuring the performance of phototransistors.<sup>1</sup>

$$P = I_{\text{illumination}} / I_{\text{dark}} \quad (1)$$

$$R = I_{\text{illumination}} (P_1 S)^{-1} \quad (2)$$

$$D^* = RS^{1/2} (2eI_{\text{dark}})^{-1/2} \quad (3)$$

where  $P_1$  is the illumination intensity and  $S$  is the illuminated area.

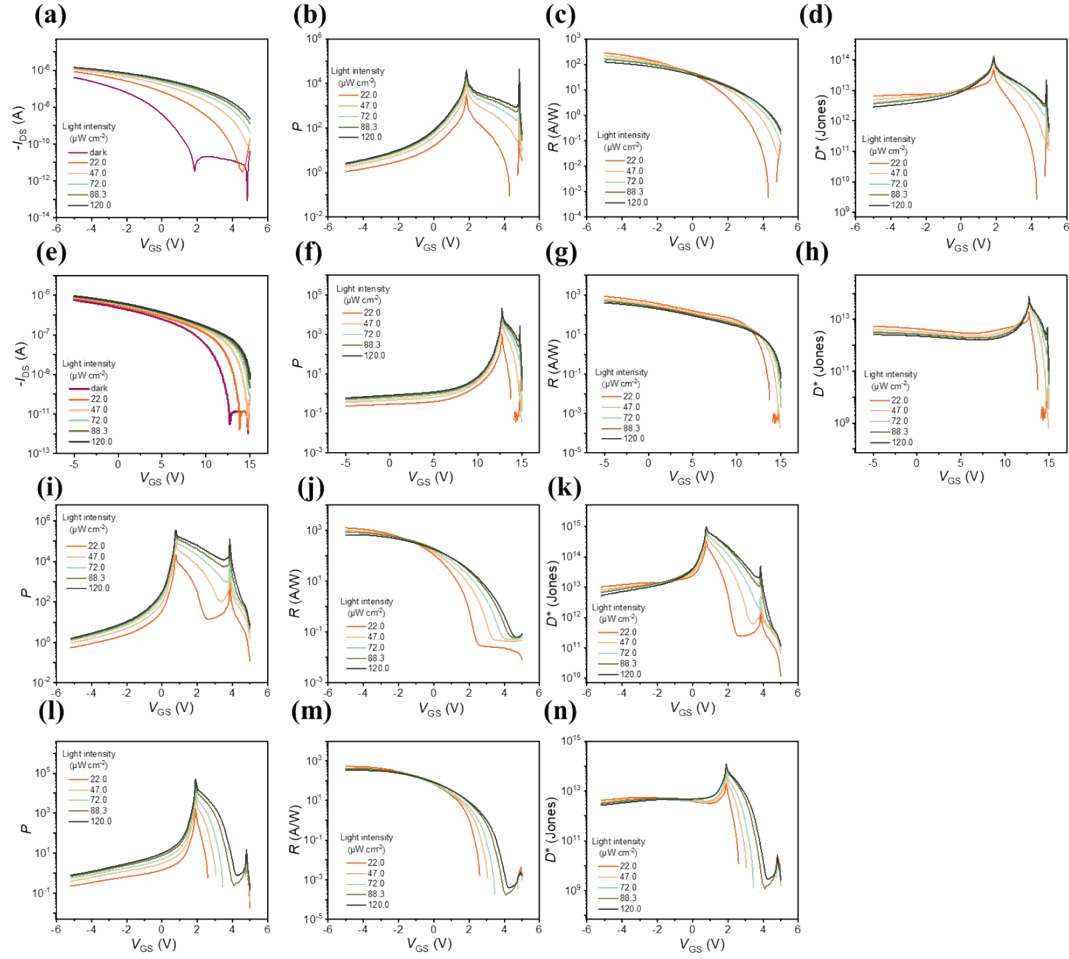

**Fig. S8** Transfer curves of (a) PVP-based and (e) PPO-based OPTs under different illumination intensities.  $P$  values of (b) PVP-based, (f) PPO-based, (i) PVP/HfO<sub>2</sub>-based, and (l) PPO/HfO<sub>2</sub>-based OPTs under different illumination intensities.  $R$  values of (c) PVP-based, (g) PPO-based, (j) PVP/HfO<sub>2</sub>-based, and (m) PPO/HfO<sub>2</sub>-based OPTs under different illumination intensities.  $D^*$  values of (d) PVP-based, (h) PPO-based, (k) PVP/HfO<sub>2</sub>-based, and (n) PPO/HfO<sub>2</sub>-based OPTs under different illumination intensities.

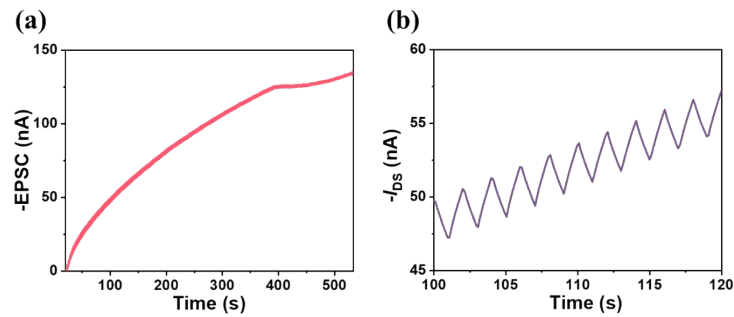

**Fig. S9** (a) Multilevel memory of PVP/HfO<sub>2</sub> by multiple light pulses (365 nm, 88.3  $\mu\text{W}/\text{cm}^2$ ,  $t_{\text{spike}} = 1$  s,  $t_{\text{interval}} = 1$  s), showing 256 storage states. (b) The corresponding magnified curves of Fig. S9a.

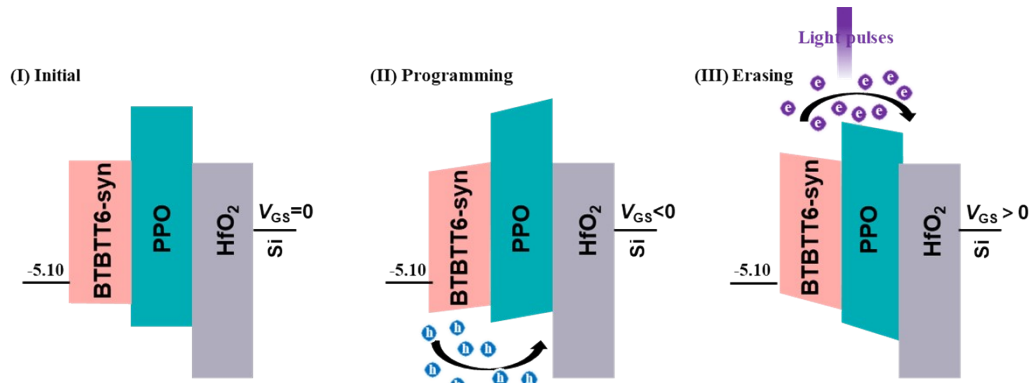

**Fig. S10** Working mechanism of electrical-programmed state and light-erased state in the PPO/HfO<sub>2</sub>-based device.

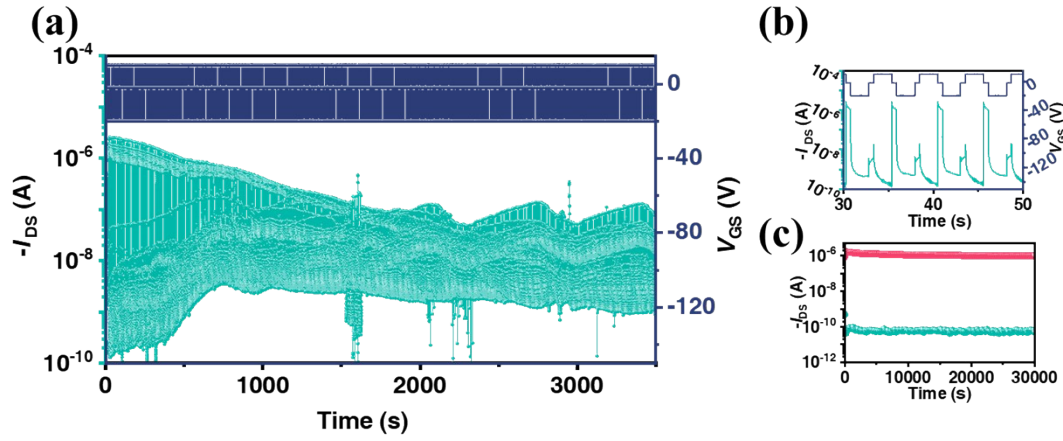

**Fig. S11** (a) Endurance characteristics of the PPO/HfO<sub>2</sub>-based device, change in off- and on- current over 700 P/E cycles. (b) Detailed curves of the endurance characteristics of the PPO/HfO<sub>2</sub>-based device, programmed by  $V_{GS} = -20$  V,  $t_{spike} = 2$  s, erased by a light pulse (365 nm,  $t_{spike} = 2$  s) with  $V_{GS} = 10$  V. (c) Retention characteristic of program state and erase state for PPO/HfO<sub>2</sub>-based device.

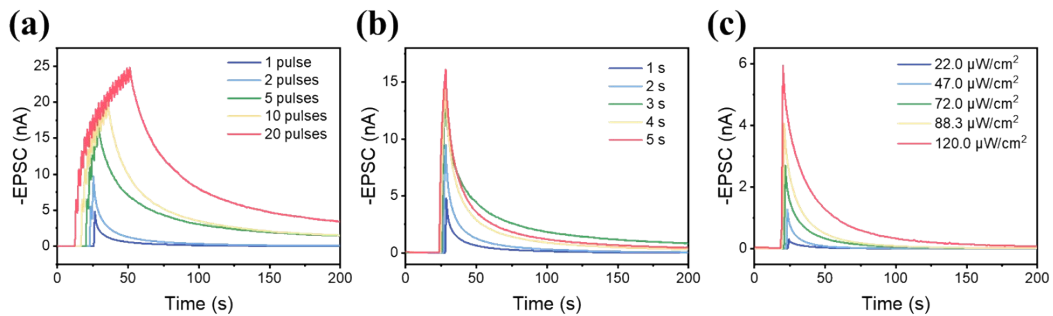

**Fig. S12** The relationship between EPSC of PVP/HfO<sub>2</sub>-based device and (a) light pulse number (b) light pulse width (c) light pulse intensity.



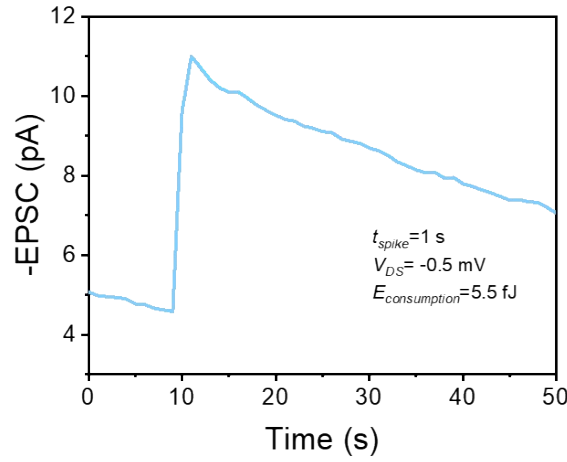

**Fig. S13** The energy consumption of PVP/HfO<sub>2</sub> triggered by light pulses ( $V_{\text{DS}} = -0.5 \text{ mV}$ ,  $t_{\text{spike}} = 1 \text{ s}$ ).

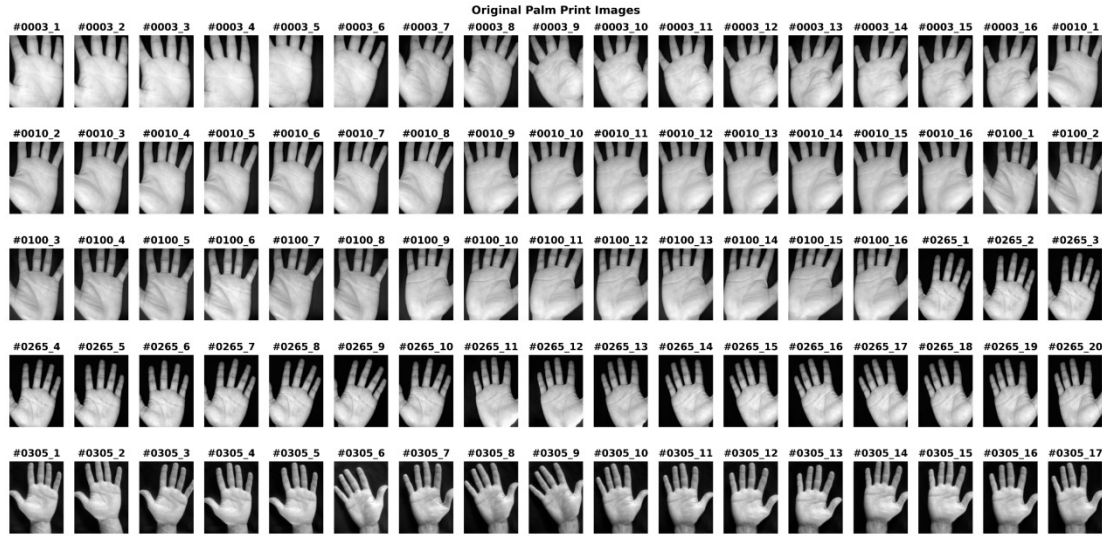

**Fig. S14** Preview of 85 palmprint images used in this work, sourced from the CASIA-Palmprint database. These images were randomly selected from 5 out of 312 participants, with specific IDs and counts as follows: ID 0003 (16 images), ID 0010 (16 images), ID 0100 (16 images), ID 0265 (20 images), and ID 0305 (17 images).



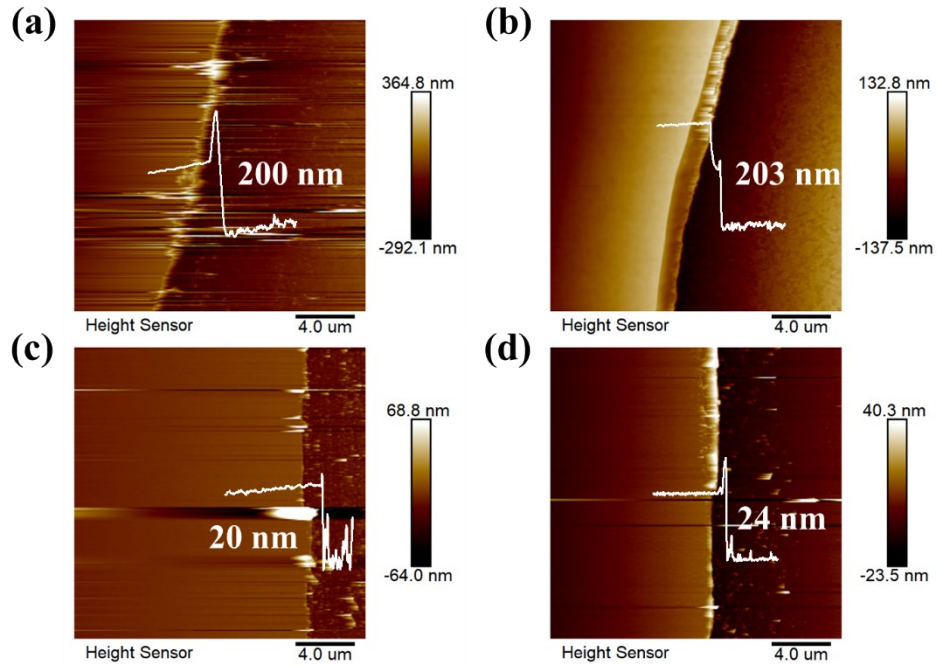

**Fig. S15** The film thickness of (a) PVP spin-coated on ITO, (b) PPO spin-coated on ITO, (c) PVP spin-coated on HfO<sub>2</sub>, and (d) PPO spin-coated on HfO<sub>2</sub> dielectric layer.

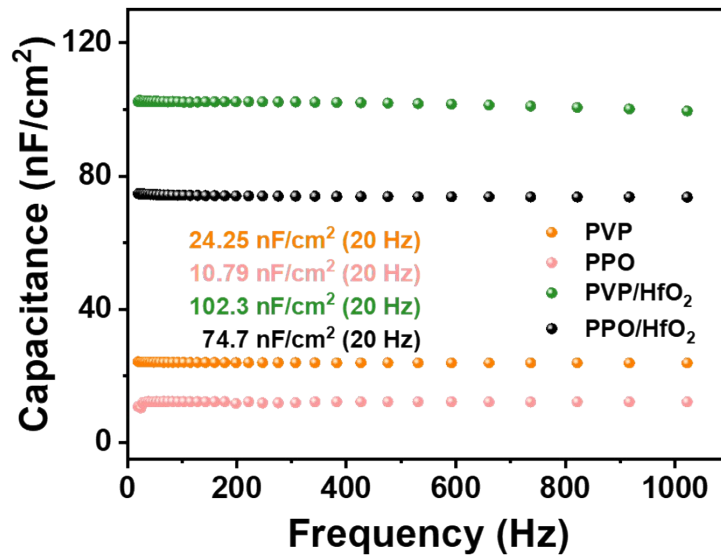

**Fig. S16** Capacitance characteristic curves of different dielectric layer from 20-10<sup>3</sup> Hz. To measure the capacitance characteristics, 100-nm-thick silver films were deposited as electrodes with an area of 4 mm<sup>2</sup> on different dielectric layers.
